# Supplementary material
Source: HighWire-hosted journal article supplement (https://bmjopen.bmj.com/content/12/1/e053327)
Supplement: inline-supplementary-material-1 [file inline-supplementary-material-1.pdf]

Appendix: Adoption and continued use of mobile contact tracing technology

**Figure A1:** Missing data patterns across attitudinal predictors + adoption (DV, wave 2)

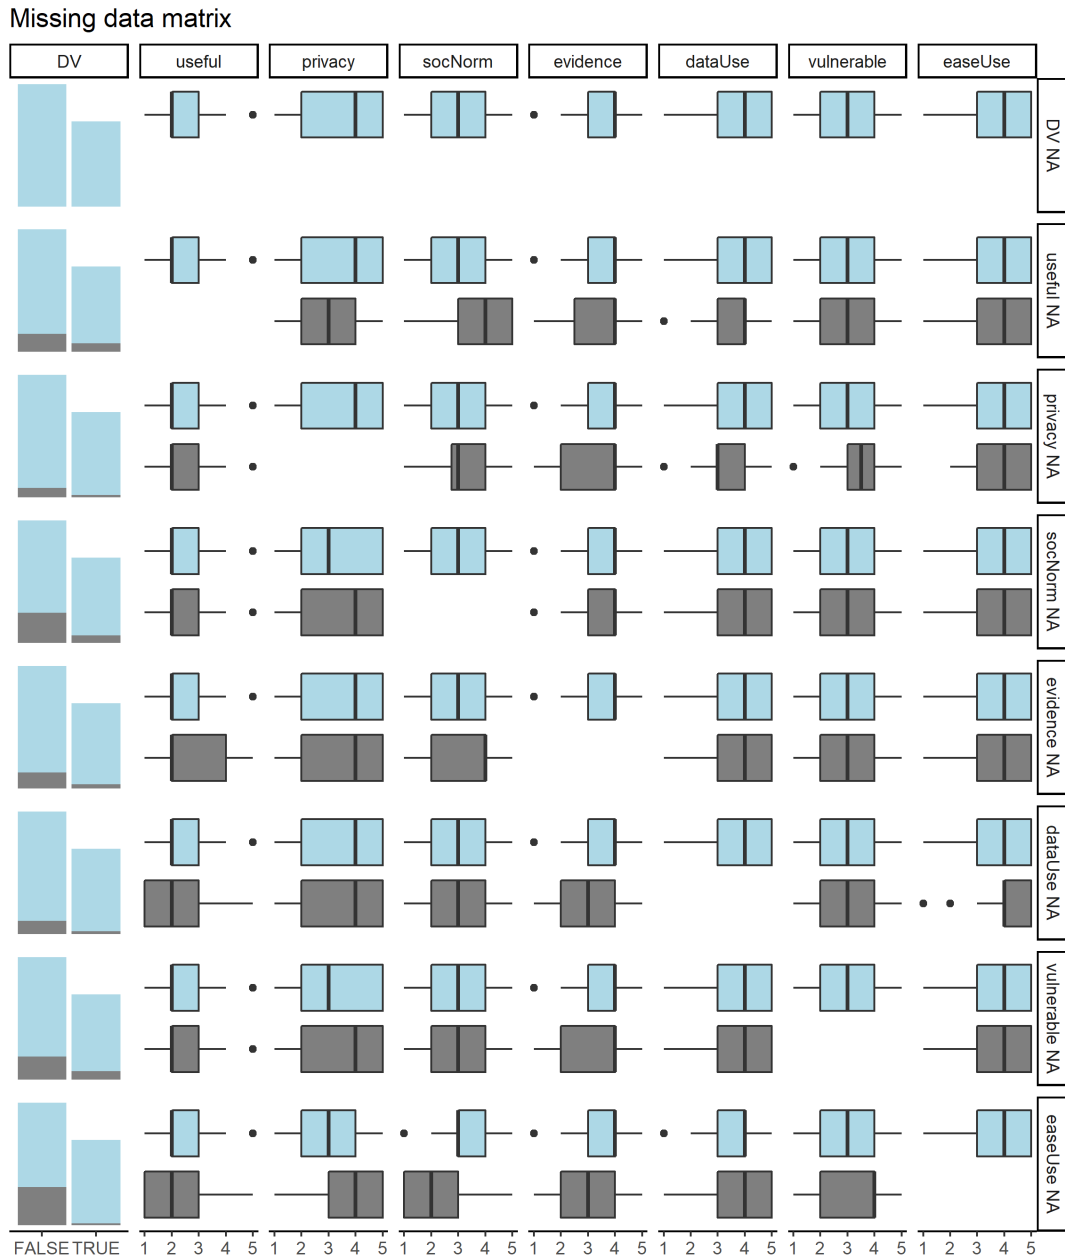

*Notes: attitudinal predictors more likely to be missing for non-adopters, particularly “ease of use”; some but not all attitudes are related to each other in terms of missingness, for example those with missing data on ease of use were more concerned about privacy.*

**Table A1:** Logistic regression results pooled across five multiply imputed\*\*\* datasets

| Model                                                                                                                                                                             | Term                                                                                                                     | Log odds  | OR    | SE   | p    | RIV* | Lambda** |      |
|-----------------------------------------------------------------------------------------------------------------------------------------------------------------------------------|--------------------------------------------------------------------------------------------------------------------------|-----------|-------|------|------|------|----------|------|
| <b>Initial adoption</b><br>N = 2,500<br>N (districts) = 1,282<br>SD (districts) = 0.34<br>m = 5***<br><br>AIC = 2596.07<br>BIC = 2712.55<br>logLik = -1278.03<br>df.resid = 2,480 | Intercept                                                                                                                | -0.82     | 0.44  | 0.23 | 0.00 | 0.02 | 0.02     |      |
|                                                                                                                                                                                   | Age                                                                                                                      | -0.18     | 0.84  | 0.06 | 0.00 | 0.04 | 0.04     |      |
|                                                                                                                                                                                   | Women                                                                                                                    | 0.01      | 1.01  | 0.10 | 0.89 | 0.01 | 0.01     |      |
|                                                                                                                                                                                   | Education                                                                                                                | 0.00      | 1.00  | 0.11 | 0.97 | 0.06 | 0.06     |      |
|                                                                                                                                                                                   | Ethnic minorities                                                                                                        | -0.03     | 0.97  | 0.19 | 0.87 | 0.04 | 0.04     |      |
|                                                                                                                                                                                   | Perceived usefulness                                                                                                     | -0.03     | 0.97  | 0.06 | 0.61 | 0.42 | 0.30     |      |
|                                                                                                                                                                                   | Privacy concern                                                                                                          | -0.81     | 0.44  | 0.07 | 0.00 | 0.05 | 0.05     |      |
|                                                                                                                                                                                   | Social norms                                                                                                             | 0.60      | 1.82  | 0.06 | 0.00 | 0.56 | 0.36     |      |
|                                                                                                                                                                                   | Transparent evidence                                                                                                     | 0.13      | 1.13  | 0.06 | 0.05 | 0.14 | 0.12     |      |
|                                                                                                                                                                                   | More info on data usage                                                                                                  | 0.12      | 1.12  | 0.07 | 0.13 | 0.19 | 0.16     |      |
|                                                                                                                                                                                   | Evidence on vulnerable groups                                                                                            | 0.01      | 1.01  | 0.06 | 0.89 | 0.15 | 0.13     |      |
|                                                                                                                                                                                   | Ease of use                                                                                                              | 0.61      | 1.84  | 0.06 | 0.00 | 0.14 | 0.12     |      |
|                                                                                                                                                                                   | Trust in UK Gov't                                                                                                        | -0.04     | 0.96  | 0.05 | 0.43 | 0.04 | 0.04     |      |
|                                                                                                                                                                                   | Mobility                                                                                                                 | -0.20     | 0.82  | 0.11 | 0.08 | 0.04 | 0.04     |      |
|                                                                                                                                                                                   | Compliance                                                                                                               | 0.29      | 1.33  | 0.12 | 0.02 | 0.04 | 0.04     |      |
|                                                                                                                                                                                   | Tier 2 (district)                                                                                                        | -0.19     | 0.83  | 0.11 | 0.10 | 0.01 | 0.01     |      |
|                                                                                                                                                                                   | Tier 3 (district)                                                                                                        | -0.20     | 0.82  | 0.16 | 0.22 | 0.03 | 0.03     |      |
| Cases (district)                                                                                                                                                                  | 0.03                                                                                                                     | 1.03      | 0.05  | 0.60 | 0.07 | 0.07 |          |      |
| Urban (district)                                                                                                                                                                  | 0.33                                                                                                                     | 1.39      | 0.18  | 0.08 | 0.01 | 0.01 |          |      |
| <b>Continued use</b><br>N = 1,026<br>m = 5***<br><br>AIC = 742.12<br>BIC = 816.12<br>logLik = -356.06<br>df.resid = 1,011                                                         | Intercept                                                                                                                | 1.67      | 5.29  | 0.28 | 0.00 | 0.01 | 0.01     |      |
|                                                                                                                                                                                   | Age                                                                                                                      | 0.12      | 1.13  | 0.11 | 0.28 | 0.01 | 0.01     |      |
|                                                                                                                                                                                   | Women                                                                                                                    | 0.17      | 1.19  | 0.21 | 0.41 | 0.01 | 0.01     |      |
|                                                                                                                                                                                   | Education                                                                                                                | 0.28      | 1.32  | 0.21 | 0.19 | 0.01 | 0.01     |      |
|                                                                                                                                                                                   | Ethnic minorities                                                                                                        | -0.28     | 0.76  | 0.35 | 0.43 | 0.00 | 0.00     |      |
|                                                                                                                                                                                   | Perceived usefulness                                                                                                     | 0.16      | 1.18  | 0.11 | 0.16 | 0.10 | 0.09     |      |
|                                                                                                                                                                                   | Privacy concern                                                                                                          | -0.26     | 0.77  | 0.13 | 0.05 | 0.03 | 0.03     |      |
|                                                                                                                                                                                   | Social norms                                                                                                             | 0.27      | 1.31  | 0.13 | 0.06 | 0.27 | 0.21     |      |
|                                                                                                                                                                                   | Transparent evidence                                                                                                     | -0.25     | 0.78  | 0.14 | 0.08 | 0.09 | 0.08     |      |
|                                                                                                                                                                                   | More info on data usage                                                                                                  | 0.00      | 1.00  | 0.14 | 1.00 | 0.10 | 0.09     |      |
|                                                                                                                                                                                   | Evidence on vulnerable groups                                                                                            | -0.03     | 0.97  | 0.12 | 0.84 | 0.12 | 0.11     |      |
|                                                                                                                                                                                   | Ease of use                                                                                                              | 0.20      | 1.22  | 0.13 | 0.13 | 0.03 | 0.03     |      |
|                                                                                                                                                                                   | Trust in UK Gov't                                                                                                        | -0.04     | 0.96  | 0.11 | 0.69 | 0.01 | 0.01     |      |
|                                                                                                                                                                                   | Mobility                                                                                                                 | 0.06      | 1.06  | 0.22 | 0.78 | 0.00 | 0.00     |      |
|                                                                                                                                                                                   | Compliance                                                                                                               | -0.16     | 0.85  | 0.22 | 0.45 | 0.01 | 0.01     |      |
|                                                                                                                                                                                   | <b>New adoption</b><br>N = 1,474<br>m = 5***<br><br>AIC = 688.88<br>BIC = 768.32<br>logLik = -329.44<br>df.resid = 1,459 | Intercept | -3.31 | 0.04 | 0.32 | 0.00 | 0.02     | 0.01 |
|                                                                                                                                                                                   |                                                                                                                          | Age       | -0.49 | 0.62 | 0.12 | 0.00 | 0.02     | 0.01 |
| Women                                                                                                                                                                             |                                                                                                                          | 0.29      | 1.34  | 0.22 | 0.19 | 0.00 | 0.00     |      |
| Education                                                                                                                                                                         |                                                                                                                          | 0.52      | 1.68  | 0.23 | 0.02 | 0.01 | 0.01     |      |
| Ethnic minorities                                                                                                                                                                 |                                                                                                                          | -0.22     | 0.80  | 0.38 | 0.56 | 0.01 | 0.01     |      |
| Perceived usefulness                                                                                                                                                              |                                                                                                                          | 0.04      | 1.04  | 0.12 | 0.77 | 0.07 | 0.07     |      |
| Privacy concern                                                                                                                                                                   |                                                                                                                          | -0.37     | 0.69  | 0.15 | 0.02 | 0.02 | 0.02     |      |
| Social norms                                                                                                                                                                      |                                                                                                                          | 0.34      | 1.40  | 0.13 | 0.02 | 0.16 | 0.14     |      |
| Transparent evidence                                                                                                                                                              |                                                                                                                          | 0.18      | 1.20  | 0.14 | 0.19 | 0.08 | 0.08     |      |
| More info on data usage                                                                                                                                                           |                                                                                                                          | 0.06      | 1.07  | 0.15 | 0.69 | 0.12 | 0.11     |      |
| Evidence on vulnerable groups                                                                                                                                                     |                                                                                                                          | 0.08      | 1.08  | 0.13 | 0.55 | 0.05 | 0.05     |      |
| Ease of use                                                                                                                                                                       |                                                                                                                          | -0.04     | 0.96  | 0.13 | 0.77 | 0.31 | 0.24     |      |
| Trust in UK Gov't                                                                                                                                                                 |                                                                                                                          | 0.34      | 1.40  | 0.12 | 0.01 | 0.01 | 0.01     |      |
| Mobility                                                                                                                                                                          |                                                                                                                          | 0.29      | 1.34  | 0.25 | 0.25 | 0.00 | 0.00     |      |
| Compliance                                                                                                                                                                        |                                                                                                                          | 0.11      | 1.12  | 0.23 | 0.63 | 0.00 | 0.00     |      |

\* Relative increase in variance due to missingness

\*\* Proportion of total variance due to missingness

\*\*\* Number of multiple imputations generated with Gibbs sampling (predictive means) implemented in mice (Van Buuren and Groothuis-Oudshoorn, 2011).
